# Supplementary material
Source: PubMed Central journal article supplement (PMC5900349)
Supplement: ncomms5641-s1.pdf [file ncomms5641-s1.pdf]

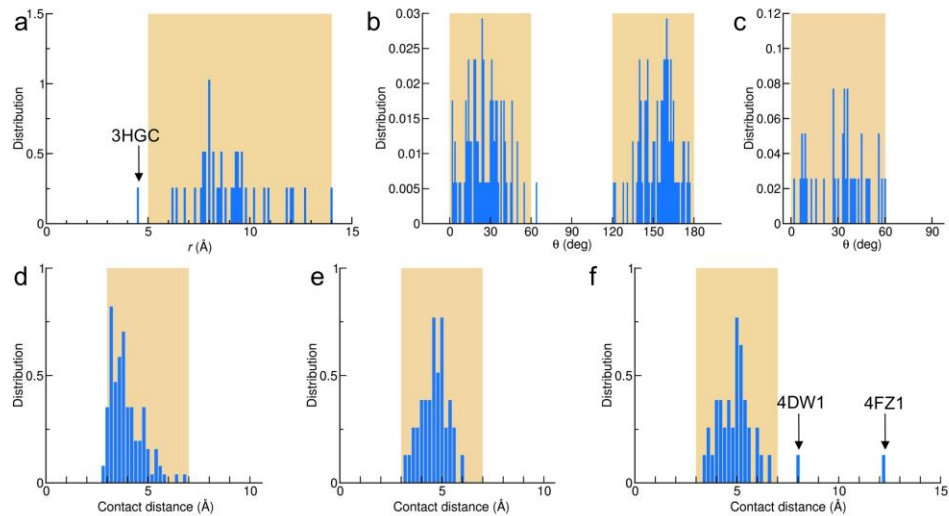

**Supplementary Figure 1 | Distributions of distances and angles for transmembrane helices.** (a) Distribution of the radial distance  $r$  for the pore-lining helix (PLH) bundle in 39 unique ion channel structures. (b) Distribution of the tilt angle  $\theta$  for 171 transmembrane helices in 26 membrane proteins. (c) Distribution of  $\theta$  for the PLH bundles of the 39 channel structures. (d) Distribution of the contact distances of 128 helix pairs in the 26 membrane proteins. (e) Distribution of the contact distances between PLHs and their nearest neighboring helices (not necessarily pore-lining) in the 39 channel structures. (f) Distribution of the contact distances between neighboring PLHs in the 39 channel structures.

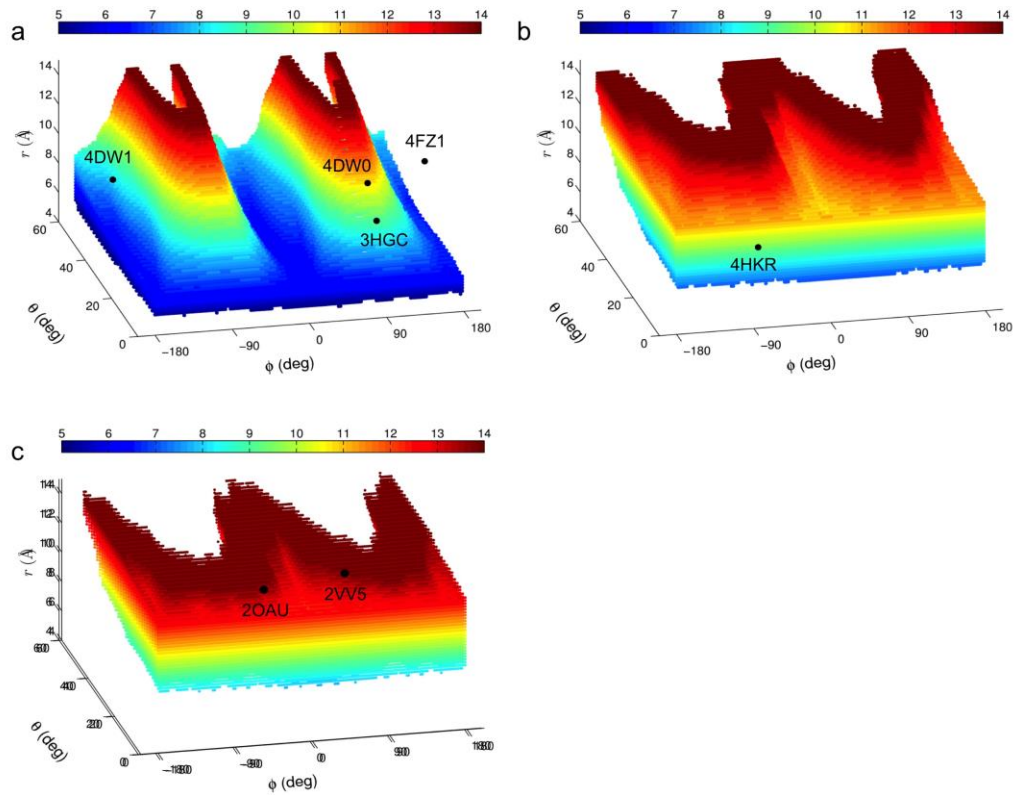

**Supplementary Figure 2 | The W-shaped accessible region in the  $r$ - $\theta$ - $\phi$  space. (a)** The accessible region for trimeric models, along with the conformations of 4 actual pore-lining helix (PLH) bundles. The  $r$  values of the plausible models are displayed according to the color scale at the top. Each black dot represents an actual PLH bundle. The closed-state P2X4 receptor and ASIC1a are within the accessible region, but their open-state counterparts are either near the border of the accessible region (4DW1 for P2X4 receptor) or well outside (4FZ1 for ASIC1a). **(b & c)** Corresponding results for hexamers and heptamers. The hexameric calcium release-activated calcium channel (4HKR) and heptameric MscS (2OAU for closed and 2VV5 for open) are within their respective W-shaped accessible regions.

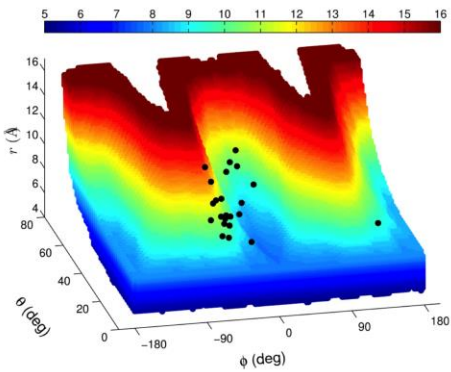

**Supplementary Figure 3 | The W-shaped accessible region in the  $r$ - $\theta$ - $\phi$  space for tetrameric models.** The ranges of parameters are  $5 \text{ \AA} < r < 16 \text{ \AA}$ ,  $0^\circ < \theta < 80^\circ$ , and  $-180^\circ < \phi < 180^\circ$ . Conformations of pore-lining helix bundles in channel structures are displayed as black dots.

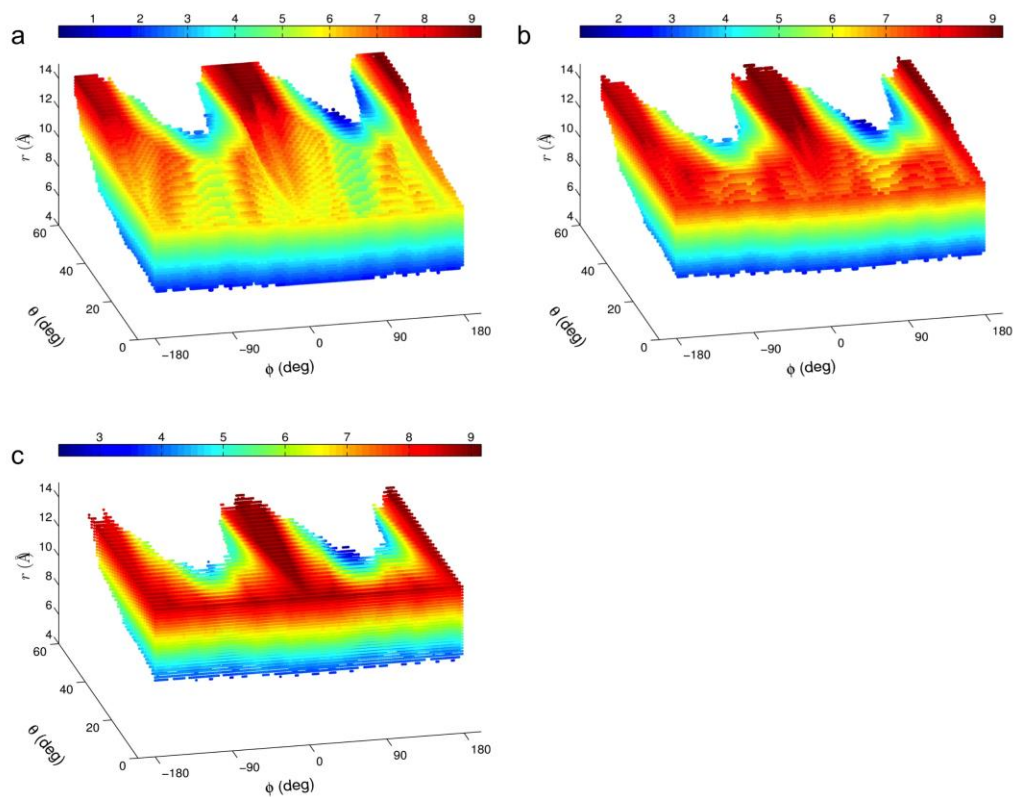

**Supplementary Figure 4 | Minimum pore radii of the plausible models. (a) Hexamers. (b) Heptamers. (c) Octamers.** In each panel, the  $R_0$  values of the plausible models are displayed according to the color scale at the top.

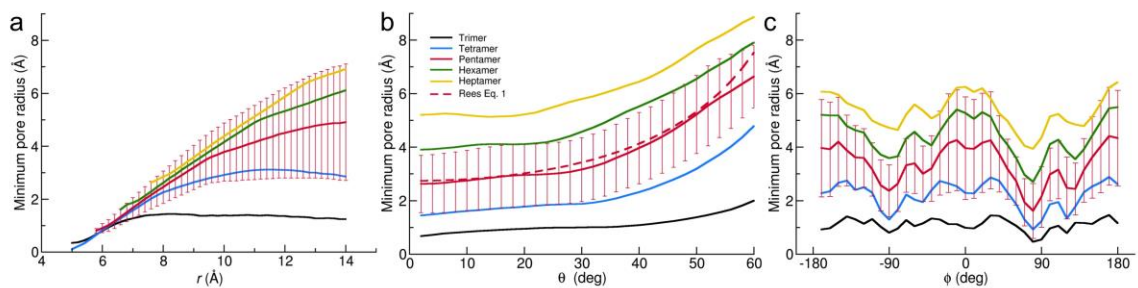

**Supplementary Figure 5 | Average  $R_0$  when only one of the three coordinates is fixed, for oligomeric states.** (a) Averaging at fixed  $r$ . (b) Averaging at fixed  $\theta$ . (c) Averaging at fixed  $\phi$ . Error bars representing standard deviations are displayed for pentamers, to indicate the significant variations in  $R_0$  when only one coordinate is fixed. In (b) the dashed curve displays the prediction of Spencer and Rees for a model of infinite cylinders with a diameter of 7.8 Å.

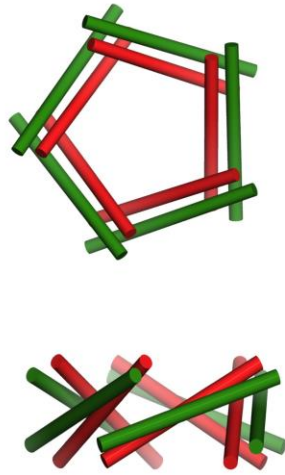

**Supplementary Figure 6 | Comparison of the open model proposed in this study for MscL (red) with a model proposed by Sukharev et al. (green). Both top and side views are shown.**

**Supplementary Table 1 | Oligomeric arrangements of pore-lining helix bundles in channel structures**

| PDB entry        | $r$ (Å) | $\theta$ (°) | $\phi$ (°) | Residues of PLHs  | Aligned segment | Ideal helix | rmsd (Å) | Description                                            | Ref. |
|------------------|---------|--------------|------------|-------------------|-----------------|-------------|----------|--------------------------------------------------------|------|
| <i>Trimers</i>   |         |              |            |                   |                 |             |          |                                                        |      |
| 3HGC             | 4.5     | 44.7         | 147.0      | A-C:<br>V427-E451 | 427-450         | 1-24        | 1.5      | ASIC1 desensitized state                               | 1    |
| 4FZ1             | 12.7    | 12.5         | 153.5      | A-C:<br>V427-L450 | 427-450         | 1-24        | 2.0      | ASIC1-psalmotoxin 1 at high pH                         | 2    |
| 4DW0             | 6.4     | 49.9         | 144.5      | A-C:<br>I335-I359 | 335-358         | 1-24        | 1.4      | P2X4R apo                                              | 3    |
| 4DW1             | 8.6     | 45.3         | -159.5     | A-C:<br>I335-I359 | 335-358         | 1-24        | 1.1      | P2X4R with ATP                                         | 3    |
| <i>Tetramers</i> |         |              |            |                   |                 |             |          |                                                        |      |
| 1BL8             | 6.8     | 32.9         | -25.1      | A-D:<br>L86-Q119  | 94-117          | 1-24        | 0.7      | KcsA                                                   | 4    |
| 1K4C             |         |              |            |                   |                 |             |          | KcsA + Fab                                             | 5    |
| 2ITC             |         |              |            |                   |                 |             |          | KcsA + Fab in NaCl                                     | 6    |
| 2NLJ             |         |              |            |                   |                 |             |          | KcsA M96V mutant in KCl                                | 6    |
| 3IGA             |         |              |            |                   |                 |             |          | KcsA in 150 mM Li <sup>+</sup> and 3 mM K <sup>+</sup> | 7    |
| 3HPL             |         |              |            |                   |                 |             |          | KcsA closed inactivated. E71H and F103A                | 8    |
| 3OR7             |         |              |            |                   |                 |             |          | KcsA E71I                                              | 9    |
| 3OR6             |         |              |            |                   |                 |             |          | KcsA E71Q                                              | 9    |
| 3STL             |         |              |            |                   |                 |             |          | KcsA Y82C with cadmium                                 | 10   |
| 3FB8             |         |              |            |                   |                 |             |          | KcsA open conductive. Open 20 Å                        | 11   |
| 3EFF             |         |              |            |                   |                 |             |          | Full length KcsA closed                                | 12   |
| 3PJS             |         |              |            |                   |                 |             |          | Full length KcsA open                                  | 13   |
| 3F7Y             |         |              |            |                   |                 |             |          | KcsA partially open. Open 17 Å                         | 11   |
| 3FB6             | 7.8     | 40.0         | -4.0       | A-D:<br>L86-F114  | 94-114          | 1-21        | 0.6      | KcsA partially open. Open 16 Å                         | 11   |
| 3FB5             |         |              |            |                   |                 |             |          | KcsA partially open. Open 14.5 Å                       | 11   |
| 3F5W             | 9.8     | 56.1         | 11.8       | A-D:<br>L86-Q117  | 94-117          | 1-24        | 1.7      | KcsA open inactivated. Open 32 Å                       | 11   |
| 3FB7             |         |              |            |                   |                 |             |          | KcsA in open state with Rb <sup>+</sup>                | 8    |
| 3F7V             |         |              |            |                   |                 |             |          | KcsA open inactivated. Open 23 Å                       | 11   |
| 2A0L             | 9.2     | 57.8         | 0.4        | A-D:<br>P207-K237 | 214-237         | 1-24        | 1.4      | KvAP + Fv fragment                                     | 14   |
| 1ORQ             |         |              |            |                   |                 |             |          | KvAP + Fab                                             | 15   |
| 2A79             | 7.7     | 48.4         | 8.6        | A-D:<br>I385-T421 | 394-417         | 1-24        | 1.6      | Kv1.2                                                  | 16   |
| 3LUT             |         |              |            |                   |                 |             |          | Full length Kv1.2                                      | 17   |
| 2R9R             |         |              |            |                   |                 |             |          | Kv1.2/Kv2.1                                            | 18   |
| 3LNM             |         |              |            |                   |                 |             |          | Kv1.2/Kv2.1 F233W                                      | 19   |
| 4H33             | 6.2     | 33.8         | 4.1        | A-D:<br>P68-T102  | 79-102          | 1-24        | 1.1      | KvLm closed                                            | 20   |
| 4H37             |         |              |            |                   |                 |             |          | KvLm in K <sup>+</sup> condition                       | 20   |
| 3LDC             | 10.2    | 55.9         | 2.6        | A-D:<br>P70-I99   | 76-99           | 1-24        | 1.7      | MthK K <sup>+</sup> channel                            | 21   |
| 1LNQ             |         |              |            |                   |                 |             |          | MthK K <sup>+</sup> channel, Ca <sup>2+</sup> gated    | 22   |
| 4HYO             |         |              |            |                   |                 |             |          | MthK K <sup>+</sup> channel. S68H & V77C               | 23   |
| 4GX5             | 12.1    | 28.0         | -53.0      | A-D:<br>S78-F108  | 79-99           | 1-21        | 1.4      | GsuK wild-type                                         | 24   |
| 4GX0             |         |              |            |                   |                 |             |          | GsuK L97D                                              | 24   |
| 4GX1             |         |              |            |                   |                 |             |          | GsuK L97D with ADP                                     | 24   |
| 4GX2             |         |              |            |                   |                 |             |          | GsuK L97D with NAD <sup>+</sup>                        | 24   |
| 3JYC             | 9.6     | 35.8         | -37.9      | A-D:              | 160-183         | 1-24        | 0.6      | Kir2.2                                                 | 25   |

| C155-K183 |      |      |       |                   |         |      |     |                                                                                        |    |
|-----------|------|------|-------|-------------------|---------|------|-----|----------------------------------------------------------------------------------------|----|
| 3SPI      |      |      |       |                   |         |      |     | Kir2.2 with PIP <sub>2</sub>                                                           | 26 |
| 3SPC      |      |      |       |                   |         |      |     | Kir2.2 with DGPP                                                                       | 26 |
| 3SPH      |      |      |       |                   |         |      |     | Kir2.2 I223L mutant with PIP <sub>2</sub>                                              | 26 |
| 3SPJ      |      |      |       |                   |         |      |     | Kir2.2 I223L mutant apo                                                                | 26 |
| 3SPG      |      |      |       |                   |         |      |     | Kir2.2 R186A mutant with PIP <sub>2</sub>                                              | 26 |
| 2QKS      | 8.2  | 34.4 | -27.9 | A-D:<br>V103-S132 | 109-132 | 1-24 | 0.6 | Kir3.1                                                                                 | 27 |
| 4KFM      | 8.8  | 43.2 | -22.6 | A-D:<br>P167-S196 | 173-196 | 1-24 | 1.1 | GIRK2 (Kir3.2) + PIP <sub>2</sub> + G-protein $\beta\gamma$ subunits + Na <sup>+</sup> | 28 |
| 3SYO      |      |      |       |                   |         |      |     | GIRK2 (Kir3.2)                                                                         | 29 |
| 3SYA      |      |      |       |                   |         |      |     | GIRK2 (Kir3.2) + PIP <sub>2</sub>                                                      | 29 |
| 3SYP      |      |      |       |                   |         |      |     | GIRK2 (Kir3.2) R201A mutant                                                            | 29 |
| 3SYQ      |      |      |       |                   |         |      |     | GIRK2 (Kir3.2) R201A mutant + PIP <sub>2</sub>                                         | 29 |
| 3SYC      |      |      |       |                   |         |      |     | GIRK2 (Kir3.2) D228N mutant                                                            | 29 |
| 1P7B      | 8.0  | 32.7 | -31.0 | A-D:<br>T120-A150 | 127-150 | 1-24 | 0.6 | KirBac1.1                                                                              | 30 |
| 2WLJ      | 7.7  | 33.7 | -23.4 | A-D:<br>G106-T136 | 113-136 | 1-24 | 0.6 | KirBac3.1 semi-latched                                                                 | 31 |
| 2WLK      |      |      |       |                   |         |      |     | KirBac3.1 latched                                                                      | 31 |
| 2WLI      |      |      |       |                   |         |      |     | KirBac3.1 semi-latched 3.09 Å                                                          | 31 |
| 2WLO      |      |      |       |                   |         |      |     | KirBac3.1 semi-latched 4.20 Å                                                          | 31 |
| 2WLM      |      |      |       |                   |         |      |     | KirBac3.1 semi-latched 3.61 Å                                                          | 31 |
| 2WLN      |      |      |       |                   |         |      |     | KirBac3.1 unlatched 3.44 Å                                                             | 31 |
| 2WLH      |      |      |       |                   |         |      |     | KirBac3.1 unlatched 3.28 Å                                                             | 31 |
| 2X6A      |      |      |       |                   |         |      |     | KirBac3.1 Q170A stalled                                                                | 31 |
| 2X6B      |      |      |       |                   |         |      |     | KirBac3.1 Q170A blocked with Ba <sup>2+</sup>                                          | 31 |
| 2X6C      |      |      |       |                   |         |      |     | KirBac3.1 Q170A conductive                                                             | 31 |
| 3ZRS      | 7.6  | 40.6 | -14.3 | A-D:<br>G106-T136 | 113-136 | 1-24 | 0.9 | KirBac3.1 open                                                                         | 32 |
| 3BEH      | 8.0  | 35.8 | -44.1 | A-D:<br>S185-G213 | 190-213 | 1-24 | 0.6 | MlotiK1                                                                                | 33 |
| 2AHY      | 9.3  | 27   | -41.7 | A-D:<br>D74-Q103  | 80-103  | 1-24 | 0.4 | NaK closed                                                                             | 34 |
| 2Q67      |      |      |       |                   |         |      |     | NaK channel with Ca <sup>2+</sup> , D66A                                               | 35 |
| 3VOU      |      |      |       |                   |         |      |     | NaK channel chimera with grafted C-terminal of a NaV channel                           | 36 |
| 3E86      | 10.7 | 59.5 | 13.9  | A-D:<br>D74-V112  | 83-103  | 2-22 | 1.7 | NaK open                                                                               | 37 |
| 3K0D      |      |      |       |                   |         |      |     | CNG-mimicking NaK channel                                                              | 38 |
| 3OUF      |      |      |       |                   |         |      |     | NaK channel K <sup>+</sup> selective mutant                                            | 39 |
| 3T1C      |      |      |       |                   |         |      |     | NaK/NaK2K channel mutant                                                               | 40 |
| 3RVY      | 9.5  | 34.7 | -42.7 | A-B:Y193-<br>M221 | 198-221 | 1-24 | 0.7 | NaVAb I217C mutant                                                                     | 41 |
| 4DXW      |      |      |       |                   |         |      |     | NaVRh                                                                                  | 42 |
| 3RW0      |      |      |       |                   |         |      |     | NaVAb M221C                                                                            | 41 |
| 4LTO      |      |      |       |                   |         |      |     | NavAe1p                                                                                | 43 |
| 4EKW      |      |      |       |                   |         |      |     | NaV closed                                                                             | 44 |
| 4F4L      | 12.0 | 39.1 | -47.7 | A-D:<br>W71-I93   | 71-93   | 2-24 | 1.0 | NaV open                                                                               | 45 |
| 3KG2      | 7.3  | 30.2 | -36.2 | A-D:<br>S595-V626 | 603-626 | 1-24 | 0.5 | GluA2                                                                                  | 46 |
| 2L0J      | 7.8  | 26.5 | 153.1 | A-D:<br>D24-F47   | 24-47   | 1-24 | 1.2 | M2 in hydrated lipid bilayer                                                           | 47 |
| 2RLF      |      |      |       |                   |         |      |     | M2 with rimantadine                                                                    | 48 |
| 3BKD      |      |      |       |                   |         |      |     | M2 crystal structure                                                                   | 49 |
| 3C9J      |      |      |       |                   |         |      |     | M2 + amantadine crystal structure                                                      | 49 |
| 3LBW      |      |      |       |                   |         |      |     | M2 transmembrane domain crystal structure                                              | 50 |



|      |      |      |        |                  |          |      |     |                                                      |    |
|------|------|------|--------|------------------|----------|------|-----|------------------------------------------------------|----|
| 2LY0 |      |      |        |                  |          |      |     | M2 S31N mutant with M2WJ332                          | 51 |
| 2KIX |      |      |        |                  |          |      |     | M2 proton channel influenza B                        | 52 |
| 2LJB |      |      |        |                  |          |      |     | M2A-M2B chimera                                      | 53 |
| 2LJC |      |      |        |                  |          |      |     | M2A-M2B with rimantadine                             | 53 |
|      |      |      |        | A-D:             |          |      |     |                                                      |    |
| 3HZQ | 9.1  | 48.6 | 23.7   | V14-I46          | 14-37    | 1-24 | 1.0 | Tetrameric MscL                                      | 54 |
|      |      |      |        | A-D:             |          |      |     |                                                      |    |
| 3J5P | 8.0  | 38.3 | -22.4  | F655-I689        | 666-689  | 1-24 | 1.9 | TRPV1 closed                                         | 55 |
| 3J5Q |      |      |        |                  |          |      |     | TRPV1 with RTX                                       | 56 |
| 3J5R |      |      |        |                  |          |      |     | TRPV1 with capsaicin                                 | 56 |
|      |      |      |        | <i>Pentamers</i> |          |      |     |                                                      |    |
|      |      |      |        | A-E:             |          |      |     |                                                      |    |
| 2OAR | 8.4  | 36.3 | 28.2   | N13-I46          | 13-36    | 1-24 | 0.7 | MscL                                                 | 57 |
|      |      |      |        | A-E:             |          |      |     |                                                      |    |
| 3RHW | 9.4  | 7.3  | 68.7   | A241-Q266        | 241-264  | 1-24 | 0.8 | GluCl receptor with Fab and ivermectin               | 58 |
|      |      |      |        | A-E:             |          |      |     |                                                      |    |
| 2M6I | 11.8 | 16.3 | 79.9   | A249-Q266        | 249-266  | 1-18 | 1.0 | GlyR receptor transmembrane domain NMR               | 59 |
|      |      |      |        | A-E: K242/       | 242/248/ |      |     |                                                      |    |
|      |      |      |        | 248/256/24       | 256/242/ |      |     |                                                      |    |
|      |      |      |        | 2/251-S269       | 251-265/ |      |     |                                                      |    |
|      |      |      |        | /L275/L283       | 271/279/ |      |     |                                                      |    |
| 1OED | 9.6  | 7.4  | 67.4   | /S269/L278       | 265/274  | 1-24 | 0.8 | nAChR closed                                         | 60 |
| 2BG9 |      |      |        |                  |          |      |     | nAChR refined                                        | 61 |
| 4AQ5 |      |      |        |                  |          |      |     | nAChR closed class                                   | 62 |
| 4AQ9 |      |      |        |                  |          |      |     | nAChR open class                                     | 62 |
|      |      |      |        | A-E:             |          |      |     |                                                      |    |
| 2VL0 | 8.6  | 9.1  | -167.7 | S226-L252        | 229-252  | 1-24 | 0.8 | ELIC                                                 | 63 |
| 4A97 |      |      |        |                  |          |      |     | ELIC with zopiclone                                  | 64 |
|      |      |      |        |                  |          |      |     | ELIC L240S F247L in 10 mM cysteamine                 | 65 |
| 3UQ7 |      |      |        |                  |          |      |     | ELIC with acetylcholine                              | 66 |
| 3RQW |      |      |        |                  |          |      |     | ELIC apo                                             | 66 |
| 3RQU |      |      |        |                  |          |      |     | ELIC with bromoform                                  | 67 |
| 3ZKR |      |      |        |                  |          |      |     |                                                      |    |
|      |      |      |        | A-E:             |          |      |     |                                                      |    |
| 3TLS | 8.2  | 10.3 | 178.8  | Y221-P243        | 221-243  | 1-23 | 1.1 | GLIC E19'P locally closed LC2                        | 68 |
|      |      |      |        |                  |          |      |     | GLIC loop2-22' oxidized locally closed LC3           | 68 |
| 3TLV |      |      |        |                  |          |      |     |                                                      |    |
| 3TLT |      |      |        |                  |          |      |     | GLIC H11'F locally closed LC1                        | 68 |
|      |      |      |        |                  |          |      |     | GLIC loop2-20' oxidized locally closed LC1           | 68 |
| 3UU3 |      |      |        |                  |          |      |     | GLIC loop2-21' reduced in crystal locally closed LC1 | 68 |
| 3UU4 |      |      |        |                  |          |      |     | GLIC loop2-24' oxidized locally closed LC1           | 68 |
| 3TLU |      |      |        |                  |          |      |     | GLIC loop2-21' oxidized locally closed LC2           | 68 |
| 3TLW |      |      |        |                  |          |      |     | GLIC WT resting state                                | 69 |
| 4NPQ |      |      |        |                  |          |      |     |                                                      |    |
|      |      |      |        | A-E:             |          |      |     |                                                      |    |
| 3EAM | 9.4  | 5.7  | 92.5   | S220-T244        | 220-243  | 1-24 | 0.7 | GLIC open                                            | 70 |
| 3UU5 |      |      |        |                  |          |      |     | GLIC loop2-20' reduced open                          | 68 |
|      |      |      |        |                  |          |      |     | GLIC loop2-21' reduced in solution open              | 68 |
| 3UUB |      |      |        |                  |          |      |     | GLIC loop2-22' reduced open                          | 68 |
| 3UU6 |      |      |        |                  |          |      |     | GLIC loop2-24' reduced open                          | 68 |
| 3UU8 |      |      |        |                  |          |      |     | GLIC open                                            | 71 |
| 3EHZ |      |      |        |                  |          |      |     | GLIC open                                            | 72 |
| 4HFI |      |      |        |                  |          |      |     | GLIC wildtype TBSb complex                           | 73 |
| 2XQA |      |      |        |                  |          |      |     | GLIC with propofol anesthetic                        | 74 |
| 3P50 |      |      |        |                  |          |      |     | GLIC with ketamine anesthetic                        | 75 |
| 4F8H |      |      |        |                  |          |      |     | GLIC WT open                                         | 69 |
| 4NPP |      |      |        |                  |          |      |     |                                                      |    |
|      |      |      |        | A-E:             |          |      |     |                                                      |    |
| 2KYV | 8.0  | 7.7  | 179.9  | A24-L52          | 24-47    | 1-24 | 0.6 | Phospholamban in T-state                             | 76 |

|      |      |      |        |            |         |      |     |                                                  |                              |    |
|------|------|------|--------|------------|---------|------|-----|--------------------------------------------------|------------------------------|----|
| 2M3B |      |      |        |            |         |      |     |                                                  | Phosphorylated phospholamban | 77 |
|      |      |      |        | A-E: N285- |         |      |     |                                                  |                              |    |
| 2BBJ | 8.5  | 20.9 | -168.1 | M302       | 285-302 | 7-24 | 1.0 | CorA                                             |                              | 78 |
| 2IUB |      |      |        |            |         |      |     | CorA                                             |                              | 79 |
| 2HN2 |      |      |        |            |         |      |     | CorA                                             |                              | 80 |
| 4EEB |      |      |        |            |         |      |     | CorA in the absence of Mg <sup>2+</sup>          |                              | 81 |
| 4EED |      |      |        |            |         |      |     | CorA in the presence of Mg <sup>2+</sup>         |                              | 81 |
| 4EV6 |      |      |        |            |         |      |     | CorA                                             |                              | 82 |
|      |      |      |        |            |         |      |     | <i>Hexamer</i>                                   |                              |    |
|      |      |      |        | A-F:       |         |      |     |                                                  |                              |    |
| 4HKR | 9.3  | 1.5  | -82.7  | T144-Q180  | 157-180 | 1-24 | 1.0 | Calcium release-activated calcium channel (CRAC) |                              | 83 |
|      |      |      |        |            |         |      |     | <i>Heptamers</i>                                 |                              |    |
|      |      |      |        | A-G:       |         |      |     |                                                  |                              |    |
| 2OAU | 10.9 | 26.9 | -12.3  | T93-L111   | 93-111  | 6-24 | 0.9 | <i>E. Coli</i> MscS                              |                              | 84 |
|      |      |      |        |            |         |      |     | <i>Thermoanaerobacter</i>                        |                              |    |
| 3T9N |      |      |        |            |         |      |     | <i>Tengcongensis</i> MscS                        |                              | 85 |
| 4HW9 |      |      |        |            |         |      |     | <i>helicobacter pylori</i> MscS                  |                              | 86 |
|      |      |      |        | A-G:       |         |      |     |                                                  |                              |    |
| 2VV5 | 14.0 | 9.3  | 55.0   | T93-L111   | 93-111  | 1-19 | 0.6 | <i>E. Coli</i> MscS A106V mutant                 |                              | 87 |
| 2HWA |      |      |        |            |         |      |     | <i>E. Coli</i> open wild type MscS               |                              | 86 |
| 4AGE |      |      |        |            |         |      |     | <i>E. Coli</i> open D67C MscS                    |                              | 88 |
| 4AGF |      |      |        |            |         |      |     | <i>E. Coli</i> open L124C MscS                   |                              | 88 |

Only entries shown in black were deemed “unique”; entries in gray were deemed similar to the preceding entries in black. There are a total of 138 entries, of which 39 are unique.

## Supplementary References

1. Gonzales, E.B., Kawate, T. & Gouaux, E. Pore architecture and ion sites in acid-sensing ion channels and P2X receptors. *Nature* **460**, 599-604 (2009).
2. Bacongus, I. & Gouaux, E. Structural plasticity and dynamic selectivity of acid-sensing ion channel-spider toxin complexes. *Nature* **489**, 400-5 (2012).
3. Hattori, M. & Gouaux, E. Molecular mechanism of ATP binding and ion channel activation in P2X receptors. *Nature* **485**, 207-12 (2012).
4. Doyle, D.A. et al. The structure of the potassium channel: molecular basis of K<sup>+</sup> conduction and selectivity. *Science* **280**, 69-77 (1998).
5. Zhou, Y., Morais-Cabral, J.H., Kaufman, A. & MacKinnon, R. Chemistry of ion coordination and hydration revealed by a K<sup>+</sup> channel-Fab complex at 2.0 Å resolution. *Nature* **414**, 43-8 (2001).
6. Lockless, S.W., Zhou, M. & MacKinnon, R. Structural and thermodynamic properties of selective ion binding in a K<sup>+</sup> channel. *PLoS Biol* **5**, e121 (2007).
7. Thompson, A.N. et al. Mechanism of potassium-channel selectivity revealed by Na<sup>(+)</sup> and Li<sup>(+)</sup> binding sites within the KcsA pore. *Nat Struct Mol Biol* **16**, 1317-24 (2009).
8. Cuello, L.G. et al. Structural basis for the coupling between activation and inactivation gates in K<sup>(+)</sup> channels. *Nature* **466**, 272-5 (2010).
9. Chakrapani, S. et al. On the structural basis of modal gating behavior in K<sup>(+)</sup> channels. *Nat Struct Mol Biol* **18**, 67-74 (2011).
10. Raghuraman, H. et al. Mechanism of Cd<sup>2+</sup> coordination during slow inactivation in potassium channels. *Structure* **20**, 1332-42 (2012).
11. Cuello, L.G., Jogini, V., Cortes, D.M. & Perozo, E. Structural mechanism of C-type inactivation in K<sup>(+)</sup> channels. *Nature* **466**, 203-8 (2010).
12. Uysal, S. et al. Crystal structure of full-length KcsA in its closed conformation. *Proc Natl Acad Sci U S A* **106**, 6644-9 (2009).
13. Uysal, S. et al. Mechanism of activation gating in the full-length KcsA K<sup>+</sup> channel. *Proc Natl Acad Sci U S A* **108**, 11896-9 (2011).
14. Lee, S.Y., Lee, A., Chen, J. & MacKinnon, R. Structure of the KvAP voltage-

- dependent K<sup>+</sup> channel and its dependence on the lipid membrane. *Proc Natl Acad Sci U S A* **102**, 15441-6 (2005).
15. Jiang, Y. et al. X-ray structure of a voltage-dependent K<sup>+</sup> channel. *Nature* **423**, 33-41 (2003).
  16. Long, S.B., Campbell, E.B. & Mackinnon, R. Crystal structure of a mammalian voltage-dependent Shaker family K<sup>+</sup> channel. *Science* **309**, 897-903 (2005).
  17. Chen, X., Wang, Q., Ni, F. & Ma, J. Structure of the full-length Shaker potassium channel Kv1.2 by normal-mode-based X-ray crystallographic refinement. *Proc Natl Acad Sci U S A* **107**, 11352-7 (2010).
  18. Long, S.B., Tao, X., Campbell, E.B. & MacKinnon, R. Atomic structure of a voltage-dependent K<sup>+</sup> channel in a lipid membrane-like environment. *Nature* **450**, 376-82 (2007).
  19. Tao, X., Lee, A., Limapichat, W., Dougherty, D.A. & MacKinnon, R. A gating charge transfer center in voltage sensors. *Science* **328**, 67-73 (2010).
  20. Santos, J.S. et al. Crystal structure of a voltage-gated K<sup>+</sup> channel pore module in a closed state in lipid membranes. *J Biol Chem* **287**, 43063-70 (2012).
  21. Ye, S., Li, Y. & Jiang, Y. Novel insights into K<sup>+</sup> selectivity from high-resolution structures of an open K<sup>+</sup> channel pore. *Nat Struct Mol Biol* **17**, 1019-23 (2010).
  22. Jiang, Y. et al. Crystal structure and mechanism of a calcium-gated potassium channel. *Nature* **417**, 515-22 (2002).
  23. Posson, D.J., McCoy, J.G. & Nimigean, C.M. The voltage-dependent gate in MthK potassium channels is located at the selectivity filter. *Nat Struct Mol Biol* **20**, 159-66 (2013).
  24. Kong, C. et al. Distinct gating mechanisms revealed by the structures of a multi-ligand gated K(+) channel. *Elife* **1**, e00184 (2012).
  25. Tao, X., Avalos, J.L., Chen, J. & MacKinnon, R. Crystal structure of the eukaryotic strong inward-rectifier K<sup>+</sup> channel Kir2.2 at 3.1 Å resolution. *Science* **326**, 1668-74 (2009).
  26. Hansen, S.B., Tao, X. & MacKinnon, R. Structural basis of PIP<sub>2</sub> activation of the classical inward rectifier K<sup>+</sup> channel Kir2.2. *Nature* **477**, 495-8 (2011).
  27. Nishida, M., Cadene, M., Chait, B.T. & MacKinnon, R. Crystal structure of a

- Kir3.1-prokaryotic Kir channel chimera. *EMBO J* **26**, 4005-15 (2007).
28. Whorton, M.R. & MacKinnon, R. X-ray structure of the mammalian GIRK2-beta gamma G-protein complex. *Nature* **498**, 190-7 (2013).
  29. Whorton, M.R. & MacKinnon, R. Crystal structure of the mammalian GIRK2 K<sup>+</sup> channel and gating regulation by G proteins, PIP<sub>2</sub>, and sodium. *Cell* **147**, 199-208 (2011).
  30. Kuo, A. et al. Crystal structure of the potassium channel KirBac1.1 in the closed state. *Science* **300**, 1922-6 (2003).
  31. Clarke, O.B. et al. Domain reorientation and rotation of an intracellular assembly regulate conduction in Kir potassium channels. *Cell* **141**, 1018-29 (2010).
  32. Bavro, V.N. et al. Structure of a KirBac potassium channel with an open bundle crossing indicates a mechanism of channel gating. *Nat Struct Mol Biol* **19**, 158-63 (2012).
  33. Clayton, G.M., Altieri, S., Heginbotham, L., Unger, V.M. & Morais-Cabral, J.H. Structure of the transmembrane regions of a bacterial cyclic nucleotide-regulated channel. *Proc Natl Acad Sci U S A* **105**, 1511-5 (2008).
  34. Shi, N., Ye, S., Alam, A., Chen, L. & Jiang, Y. Atomic structure of a Na<sup>+</sup>- and K<sup>+</sup>-conducting channel. *Nature* **440**, 570-4 (2006).
  35. Alam, A., Shi, N. & Jiang, Y. Structural insight into Ca<sup>2+</sup> specificity in tetrameric cation channels. *Proc Natl Acad Sci U S A* **104**, 15334-9 (2007).
  36. Irie, K., Shimomura, T. & Fujiyoshi, Y. The C-terminal helical bundle of the tetrameric prokaryotic sodium channel accelerates the inactivation rate. *Nat Commun* **3**, 793 (2012).
  37. Alam, A. & Jiang, Y. High-resolution structure of the open NaK channel. *Nat Struct Mol Biol* **16**, 30-4 (2009).
  38. Derebe, M.G., Zeng, W., Li, Y., Alam, A. & Jiang, Y. Structural studies of ion permeation and Ca<sup>2+</sup> blockage of a bacterial channel mimicking the cyclic nucleotide-gated channel pore. *Proc Natl Acad Sci U S A* **108**, 592-7 (2011).
  39. Derebe, M.G. et al. Tuning the ion selectivity of tetrameric cation channels by changing the number of ion binding sites. *Proc Natl Acad Sci U S A* **108**, 598-602 (2011).

40. Sauer, D.B., Zeng, W., Raghunathan, S. & Jiang, Y. Protein interactions central to stabilizing the K<sup>+</sup> channel selectivity filter in a four-sited configuration for selective K<sup>+</sup> permeation. *Proc Natl Acad Sci U S A* **108**, 16634-9 (2011).
41. Payandeh, J., Scheuer, T., Zheng, N. & Catterall, W.A. The crystal structure of a voltage-gated sodium channel. *Nature* **475**, 353-8 (2011).
42. Zhang, X. et al. Crystal structure of an orthologue of the NaChBac voltage-gated sodium channel. *Nature* **486**, 130-4 (2012).
43. Shaya, D. et al. Structure of a prokaryotic sodium channel pore reveals essential gating elements and an outer ion binding site common to eukaryotic channels. *J Mol Biol* **426**, 467-83 (2014).
44. Payandeh, J., Gamal El-Din, T.M., Scheuer, T., Zheng, N. & Catterall, W.A. Crystal structure of a voltage-gated sodium channel in two potentially inactivated states. *Nature* **486**, 135-9 (2012).
45. McCusker, E.C. et al. Structure of a bacterial voltage-gated sodium channel pore reveals mechanisms of opening and closing. *Nat Commun* **3**, 1102 (2012).
46. Sobolevsky, A.I., Rosconi, M.P. & Gouaux, E. X-ray structure, symmetry and mechanism of an AMPA-subtype glutamate receptor. *Nature* **462**, 745-56 (2009).
47. Sharma, M. et al. Insight into the mechanism of the influenza A proton channel from a structure in a lipid bilayer. *Science* **330**, 509-12 (2010).
48. Schnell, J.R. & Chou, J.J. Structure and mechanism of the M2 proton channel of influenza A virus. *Nature* **451**, 591-5 (2008).
49. Stouffer, A.L. et al. Structural basis for the function and inhibition of an influenza virus proton channel. *Nature* **451**, 596-9 (2008).
50. Acharya, R. et al. Structure and mechanism of proton transport through the transmembrane tetrameric M2 protein bundle of the influenza A virus. *Proc Natl Acad Sci U S A* **107**, 15075-80 (2010).
51. Wang, J. et al. Structure and inhibition of the drug-resistant S31N mutant of the M2 ion channel of influenza A virus. *Proc Natl Acad Sci U S A* **110**, 1315-20 (2013).
52. Wang, J., Pielak, R.M., McClintock, M.A. & Chou, J.J. Solution structure and functional analysis of the influenza B proton channel. *Nat Struct Mol Biol* **16**,

- 1267-71 (2009).
53. Pielak, R.M., Oxenoid, K. & Chou, J.J. Structural investigation of rimantadine inhibition of the AM2-BM2 chimera channel of influenza viruses. *Structure* **19**, 1655-63 (2011).
  54. Liu, Z., Gandhi, C.S. & Rees, D.C. Structure of a tetrameric MscL in an expanded intermediate state. *Nature* **461**, 120-4 (2009).
  55. Liao, M., Cao, E., Julius, D. & Cheng, Y. Structure of the TRPV1 ion channel determined by electron cryo-microscopy. *Nature* **504**, 107-12 (2013).
  56. Cao, E., Liao, M., Cheng, Y. & Julius, D. TRPV1 structures in distinct conformations reveal activation mechanisms. *Nature* **504**, 113-8 (2013).
  57. Chang, G., Spencer, R.H., Lee, A.T., Barclay, M.T. & Rees, D.C. Structure of the MscL homolog from *Mycobacterium tuberculosis*: a gated mechanosensitive ion channel. *Science* **282**, 2220-6 (1998).
  58. Hibbs, R.E. & Gouaux, E. Principles of activation and permeation in an anion-selective Cys-loop receptor. *Nature* **474**, 54-60 (2011).
  59. Mowrey, D.D. et al. Open-channel structures of the human glycine receptor alpha1 full-length transmembrane domain. *Structure* **21**, 1897-904 (2013).
  60. Miyazawa, A., Fujiyoshi, Y. & Unwin, N. Structure and gating mechanism of the acetylcholine receptor pore. *Nature* **423**, 949-55 (2003).
  61. Unwin, N. Refined structure of the nicotinic acetylcholine receptor at 4A resolution. *J Mol Biol* **346**, 967-89 (2005).
  62. Unwin, N. & Fujiyoshi, Y. Gating movement of acetylcholine receptor caught by plunge-freezing. *J Mol Biol* **422**, 617-34 (2012).
  63. Hilf, R.J. & Dutzler, R. X-ray structure of a prokaryotic pentameric ligand-gated ion channel. *Nature* **452**, 375-9 (2008).
  64. Spurny, R. et al. Pentameric ligand-gated ion channel ELIC is activated by GABA and modulated by benzodiazepines. *Proc Natl Acad Sci U S A* **109**, E3028-34 (2012).
  65. Gonzalez-Gutierrez, G. et al. Mutations that stabilize the open state of the *Erwinia chrisanthemi* ligand-gated ion channel fail to change the conformation of the pore domain in crystals. *Proc Natl Acad Sci U S A* **109**, 6331-6 (2012).

66. Pan, J. et al. Structure of the pentameric ligand-gated ion channel ELIC cocrystallized with its competitive antagonist acetylcholine. *Nat Commun* **3**, 714 (2012).
67. Spurny, R. et al. Multisite binding of a general anesthetic to the prokaryotic pentameric *Erwinia chrysanthemi* ligand-gated ion channel (ELIC). *J Biol Chem* **288**, 8355-64 (2013).
68. Prevost, M.S. et al. A locally closed conformation of a bacterial pentameric proton-gated ion channel. *Nat Struct Mol Biol* **19**, 642-9 (2012).
69. Sauguet, L. et al. Crystal structures of a pentameric ligand-gated ion channel provide a mechanism for activation. *Proc Natl Acad Sci U S A* **111**, 966-71 (2014).
70. Bocquet, N. et al. X-ray structure of a pentameric ligand-gated ion channel in an apparently open conformation. *Nature* **457**, 111-4 (2009).
71. Hilf, R.J. & Dutzler, R. Structure of a potentially open state of a proton-activated pentameric ligand-gated ion channel. *Nature* **457**, 115-8 (2009).
72. Sauguet, L. et al. Structural basis for ion permeation mechanism in pentameric ligand-gated ion channels. *EMBO J* **32**, 728-41 (2013).
73. Hilf, R.J. et al. Structural basis of open channel block in a prokaryotic pentameric ligand-gated ion channel. *Nat Struct Mol Biol* **17**, 1330-6 (2010).
74. Nury, H. et al. X-ray structures of general anaesthetics bound to a pentameric ligand-gated ion channel. *Nature* **469**, 428-31 (2011).
75. Pan, J. et al. Structure of the pentameric ligand-gated ion channel GLIC bound with anesthetic ketamine. *Structure* **20**, 1463-9 (2012).
76. Verardi, R., Shi, L., Traaseth, N.J., Walsh, N. & Veglia, G. Structural topology of phospholamban pentamer in lipid bilayers by a hybrid solution and solid-state NMR method. *Proc Natl Acad Sci U S A* **108**, 9101-6 (2011).
77. Vostrikov, V.V., Mote, K.R., Verardi, R. & Veglia, G. Structural dynamics and topology of phosphorylated phospholamban homopentamer reveal its role in the regulation of calcium transport. *Structure* **21**, 2119-30 (2013).
78. Lunin, V.V. et al. Crystal structure of the CorA Mg<sup>2+</sup> transporter. *Nature* **440**, 833-7 (2006).



79. Eshaghi, S. et al. Crystal structure of a divalent metal ion transporter CorA at 2.9 angstrom resolution. *Science* **313**, 354-7 (2006).
80. Payandeh, J. & Pai, E.F. A structural basis for Mg<sup>2+</sup> homeostasis and the CorA translocation cycle. *EMBO J* **25**, 3762-73 (2006).
81. Pfoh, R. et al. Structural asymmetry in the magnesium channel CorA points to sequential allosteric regulation. *Proc Natl Acad Sci U S A* **109**, 18809-14 (2012).
82. Guskov, A. et al. Structural insights into the mechanisms of Mg<sup>2+</sup> uptake, transport, and gating by CorA. *Proc Natl Acad Sci U S A* **109**, 18459-64 (2012).
83. Hou, X., Pedi, L., Diver, M.M. & Long, S.B. Crystal structure of the calcium release-activated calcium channel Orai. *Science* **338**, 1308-13 (2012).
84. Bass, R.B., Strop, P., Barclay, M. & Rees, D.C. Crystal structure of Escherichia coli MscS, a voltage-modulated and mechanosensitive channel. *Science* **298**, 1582-7 (2002).
85. Zhang, X. et al. Structure and molecular mechanism of an anion-selective mechanosensitive channel of small conductance. *Proc Natl Acad Sci U S A* **109**, 18180-5 (2012).
86. Lai, J.Y., Poon, Y.S., Kaiser, J.T. & Rees, D.C. Open and shut: crystal structures of the dodecylmaltoside solubilized mechanosensitive channel of small conductance from Escherichia coli and Helicobacter pylori at 4.4 Å and 4.1 Å resolutions. *Protein Sci* **22**, 502-9 (2013).
87. Wang, W. et al. The structure of an open form of an E. coli mechanosensitive channel at 3.45 Å resolution. *Science* **321**, 1179-83 (2008).
88. Pliotas, C. et al. Conformational state of the MscS mechanosensitive channel in solution revealed by pulsed electron-electron double resonance (PELDOR) spectroscopy. *Proc Natl Acad Sci U S A* **109**, E2675-82 (2012).
